# Supplementary material for: Evaluation of digital PCR for detecting low-level EGFR mutations in advanced lung adenocarcinoma patients: a cross-platform comparison study
Source: PubMed Central journal article supplement (PMC5620214; doi:10.18632/oncotarget.18866), 2017-06-29
Supplement: oncotarget-08-67810-s001.pdf [file oncotarget-08-67810-s001.pdf]

# Evaluation of digital PCR for detecting low-level EGFR mutations in advanced lung adenocarcinoma patients: a cross-platform comparison study

## SUPPLEMENTARY MATERIALS

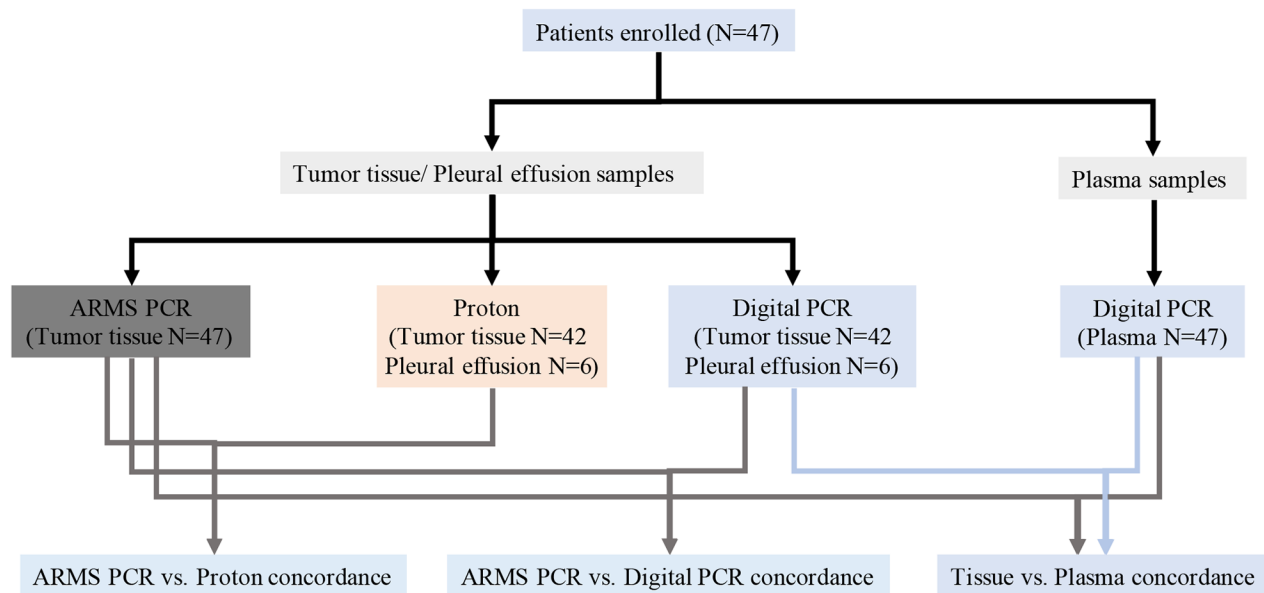

**Supplementary Figure 1: Study design for the detection of EGFR mutations in matched tumor tissue and plasma specimens from NSCLC patients.** Paired tumor tissue and plasma samples were collected from the enrolled NSCLC patients. Tumor tissue samples were detected using ARMS PCR, Proton, and digital PCR methods and platforms, while plasma samples were detected using digital PCR only.

**Supplementary Table 1: Summary of EGFR status identified by ARMS PCR, Proton and digital PCR.**

See Supplementary File 1

**Supplementary Table 2: Classification of EGFR mutation status identified by three platforms**

| Mutation pattern                | Tumor tissue |         |           |         |                |         |
|---------------------------------|--------------|---------|-----------|---------|----------------|---------|
|                                 | ARMS**       | Percent | Proton*** | Percent | Digital PCR*** | Percent |
| No mutation detected            | 21           | 44.68%  | 18        | 42.86%  | 10             | 23.81%  |
| Activating mutations*           | 23           | 48.94%  | 21        | 50.00%  | 14             | 33.33%  |
| T790M plus activating mutations | 3            | 6.38%   | 3         | 7.14%   | 9              | 21.43%  |
| T790M only                      | 0            | 0.00%   | 0         | 0.00%   | 9              | 21.43%  |

\*. Patients harbored EGFR exon 19 deletion and/ or L858R mutations; \*\*. There was a total of 47 tumor tissue samples detected using ARMS PCR; \*\*\*. There was a total of 42 tumor tissue samples detected using Proton and Digital PCR, other 5 were pleural effusion samples. As comparison limited in tumor tissue, we only calculated 42 tumor tissue.

**Supplementary Table 3: Discordant results with Proton and digital PCR detection of the EGFR mutations from tumor tissue DNA**

| Sample ID | Gender | Stage | Gene | Mutation | ARMS tissue       |     | Proton tissue     |       | Digital PCR tissue |       |
|-----------|--------|-------|------|----------|-------------------|-----|-------------------|-------|--------------------|-------|
|           |        |       |      |          | Positive/negative | MAF | Positive/negative | MAF   | Positive/negative  | MAF   |
| P06       | Male   | IIIB  | EGFR | T790M    | N                 |     | N                 |       | P                  | 0.16% |
| P12       | Female | IV    | EGFR | L858R    | N                 |     | N                 | 0.36% | P                  | 0.42% |
| P13       | Male   | IV    | EGFR | T790M    | N                 |     | N                 |       | P                  | 0.10% |
| P18       | Female | IV    | EGFR | T790M    | N                 |     | N                 |       | P                  | 0.11% |
| P20       | Female | IV    | EGFR | T790M    | N                 |     | N                 |       | P                  | 0.21% |
| P22       | Male   | IV    | EGFR | T790M    | N                 |     | N                 | 0.22% | P                  | 0.10% |
| P23       | Male   | IV    | EGFR | T790M    | N                 |     | N                 | 0.11% | P                  | 0.22% |
| P27       | Male   | IV    | EGFR | T790M    | N                 |     | N                 |       | P                  | 0.12% |
| P33       | Female | IV    | EGFR | T790M    | N                 |     | N                 |       | P                  | 0.32% |
| P34       | Male   | IV    | EGFR | T790M    | N                 |     | N                 |       | P                  | 0.30% |
| P35       | Female | IV    | EGFR | T790M    | N                 |     | N                 |       | P                  | 0.25% |
| P36       | Female | IV    | EGFR | T790M    | N                 |     | N                 |       | P                  | 0.17% |
| P37       | Male   | IV    | EGFR | T790M    | N                 |     | N                 |       | P                  | 0.19% |
| P38       | Female | IV    | EGFR | T790M    | N                 |     | N                 |       | P                  | 0.26% |
| P40       | Male   | IV    | EGFR | T790M    | N                 |     | N                 |       | P                  | 0.18% |
| P40       | Male   | IV    | EGFR | 19del    | P                 |     | P                 | 2.91% | N                  |       |
| P42       | Female | IV    | EGFR | T790M    | N                 |     | N                 |       | P                  | 0.23% |

MAF., mutation allelic abundance.

Supplementary Table 4: Discordant EGFR mutations of tumor tissue and plasma

| Sample ID | Gene | Mutation | ARMS tissue       | Proton tissue     |        | Digital PCR tissue |        | Digital PCR plasma |       |
|-----------|------|----------|-------------------|-------------------|--------|--------------------|--------|--------------------|-------|
|           |      |          | Positive/negative | Positive/negative | MAF    | Positive/negative  | MAF    | Positive/negative  | MAF   |
| P06       | EGFR | T790M    | N                 | N                 |        | P                  | 0.16%  | N                  |       |
| P08       | EGFR | L858R    | P                 | P                 | 21.72% | P                  | 16.91% | N                  |       |
| P10       | EGFR | L858R    | P                 | P                 | 1.96%  | P                  | 2.23%  | N                  |       |
| P12       | EGFR | L858R    | N                 | N                 | 0.36%  | P                  | 0.42%  | N                  |       |
| P13       | EGFR | T790M    | N                 | N                 |        | P                  | 0.10%  | N                  |       |
| P18       | EGFR | T790M    | N                 | N                 |        | P                  | 0.11%  | N                  |       |
| P20       | EGFR | T790M    | N                 | N                 |        | P                  | 0.21%  | N                  |       |
| P22       | EGFR | T790M    | N                 | N                 | 0.22%  | P                  | 0.10%  | N                  |       |
| P23       | EGFR | T790M    | N                 | N                 | 0.11%  | P                  | 0.22%  | N                  |       |
| P28       | EGFR | 19del    | N                 | N                 |        | N                  |        | P                  | 2.49% |
| P31       | EGFR | 19del    | P                 | P                 | 55.71% | P                  | 54.38% | N                  |       |
| P33       | EGFR | T790M    | N                 | N                 |        | P                  | 0.32%  | N                  |       |
| P34       | EGFR | T790M    | N                 | N                 |        | P                  | 0.30%  | N                  |       |
| P34       | EGFR | 19del    | P                 | P                 | 48.91% | P                  | 47.82% | N                  |       |
| P35       | EGFR | T790M    | N                 | N                 |        | P                  | 0.25%  | N                  |       |
| P36       | EGFR | T790M    | N                 | N                 |        | P                  | 0.17%  | N                  |       |
| P37       | EGFR | T790M    | N                 | N                 |        | P                  | 0.19%  | N                  |       |
| P37       | EGFR | 19del    | N                 | P                 | 1.22%  | P                  | 0.57%  | N                  |       |
| P38       | EGFR | T790M    | N                 | N                 |        | P                  | 0.26%  | N                  |       |
| P38       | EGFR | 19del    | N                 | P                 | 2.40%  | P                  | 2.91%  | N                  |       |
| P40       | EGFR | T790M    | N                 | N                 |        | P                  | 0.18%  | N                  |       |
| P42       | EGFR | T790M    | N                 | N                 |        | P                  | 0.23%  | N                  |       |

MAF., mutation allelic abundance.

#### Supplementary Table 5: Cut-off value of ROC curve

See Supplementary File 2
